# Supplementary material for: SARS-CoV-2 Omicron Induces Enhanced Mucosal Interferon Response Compared to other Variants of Concern, Associated with Restricted Replication in Human Lung Tissues
Source: MDPI journal article supplement (doi:10.3390/v14071583), 2022-07-21
Supplement: s1 [file s1]

## Supplementary Material

### Supplementary Figures

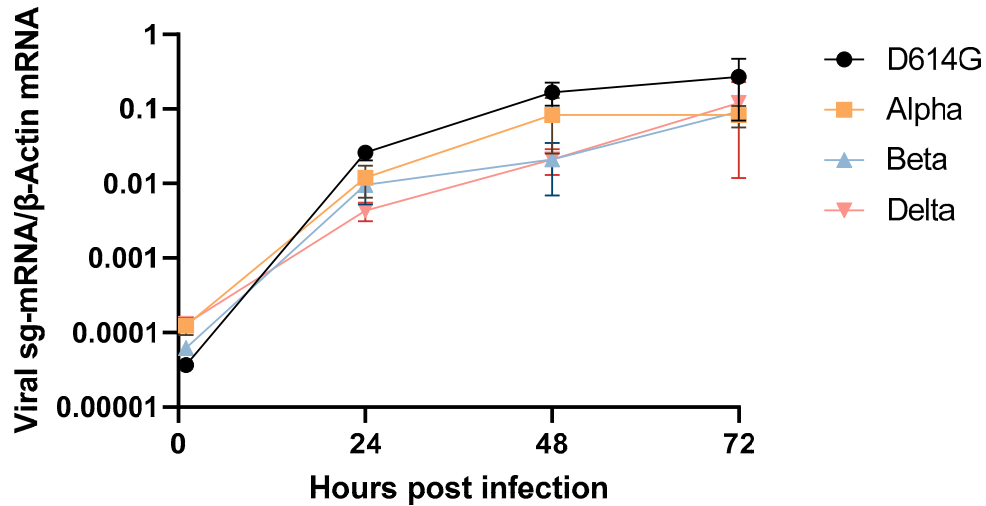

**Figure S1. Replication kinetics of SARS-CoV-2 variants in human lung tissues.** Lung organ cultures were infected in parallel with the indicated variants. Levels of tissue-associated SARS-CoV-2 N gene subgenomic (sg)-mRNA were determined by RT-qPCR and normalized to  $\beta$ -actin. The data shown represent the mean values ( $\pm$  SEM) of at least three independent tissues, each tested in 4 biological replicates.

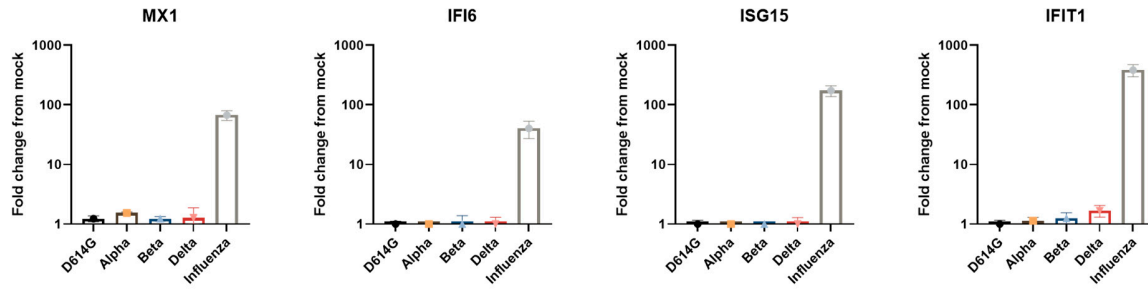

**Figure S2. Lung tissue ISG response to SARS-CoV-2 variants and influenza.** Lung organ cultures were infected in parallel with the indicated variants, and with Influenza A/H1N1 ( $10^5$  PFU/well). RNA was extracted from mock- and infected tissues at 24h post infection, and the effect of infection by the indicated viruses on the expression of interferon-stimulated genes (ISG) is presented as fold-change from mock infection. The data shown represent the mean values ( $\pm$  SEM) of at least three independent tissues, each tested in 4 biological replicates.

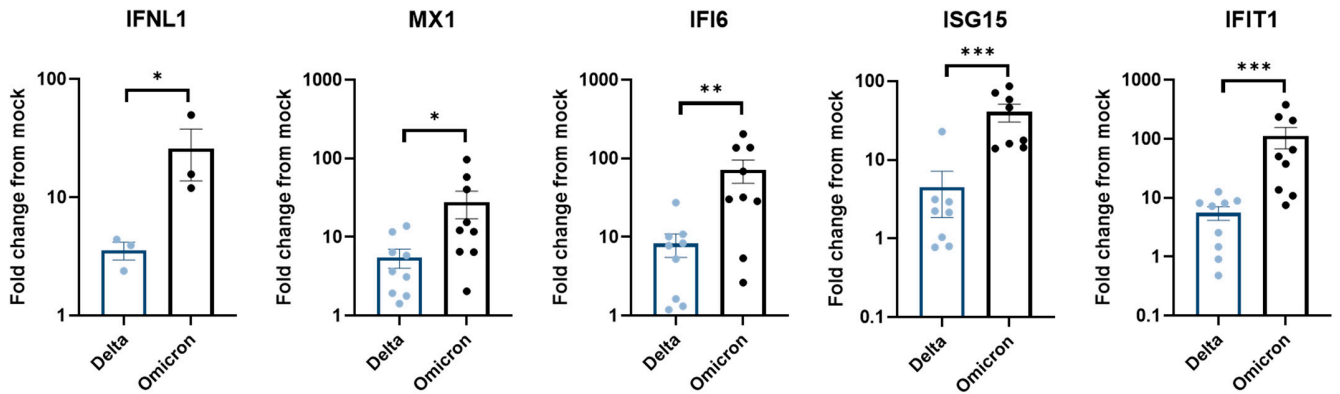

**Figure S3. Nasal tissue ISG response to SARS-CoV-2 Omicron and Delta.** Nasal organ cultures were infected in parallel with Omicron and Delta ( $10^5$  PFU/well), and the effect of infection on the expression of the indicated interferon-stimulated genes (ISG), measured by RT-qPCR at 24h post infection, is presented as fold-change from mock-infection. The data shown represent the mean values ( $\pm$  SEM) of 3 independent tissues (for IFNL1) and 9 independent tissues (for MX1, IFI6, ISG15, and IFIT1), each tested in 4 biological replicates. \*,  $P < 0.05$ ; \*\*,  $P < 0.01$ ; \*\*\*,  $P < 0.001$

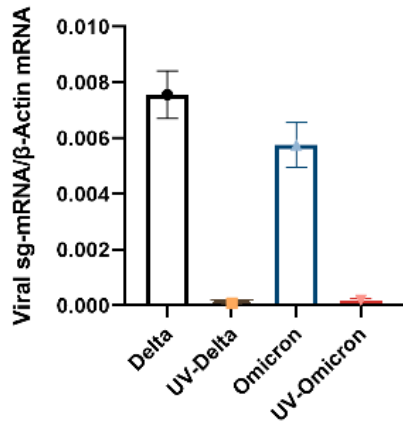

**Figure S4. Viral subgenomic (sg)-mRNA in lung tissues exposed to infectious versus UV-inactivated SARS-CoV-2 Omicron and Delta.** Lung organ cultures were exposed in parallel to infectious versus UV-inactivated Omicron and Delta variants ( $10^5$  PFU/well), and the levels of tissue-associated viral sg-mRNA were measured by RT-qPCR at 24h post infection. The results shown as mean values ( $\pm$  SEM) in a representative tissue (tested in 4 biological replicates), represent at least three independent lung tissues.

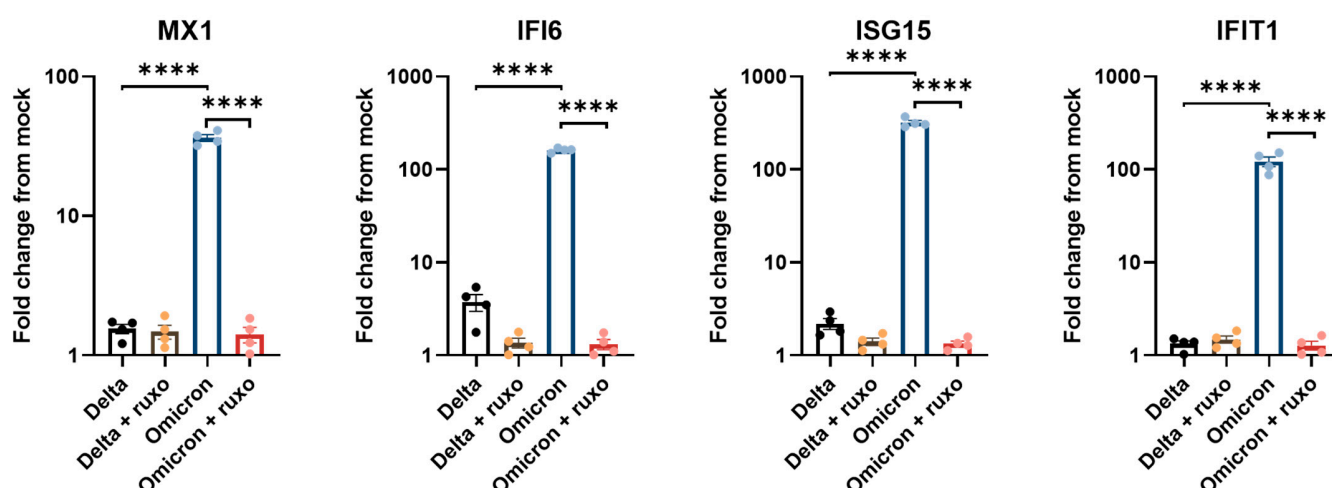

**Figure S5. Effect of Ruxolitinib on lung tissue ISG response to Omicron infection.** Lung organ cultures were pretreated with 5uM Ruxolitinib (Ruxo) for 16 h when indicated and infected in parallel with Omicron and Delta ( $10^5$  PFU/well). The effect of infection with or without Ruxo on the expression of the indicated interferon-stimulated genes (ISG), measured by RT-qPCR at 24h post infection, is presented as fold-change from mock-infection. The data shown represent the mean values ( $\pm$  SEM) of 4 biological replicates. \*\*\*,  $P < 0.001$ ; \*\*\*\*,  $P < 0.0001$
