# Supplementary material for: SARS-CoV-2 Omicron Induces Enhanced Mucosal Interferon Response Compared to other Variants of Concern, Associated with Restricted Replication in Human Lung Tissues
Source: Viruses. 2022 Jul 21;14(7):1583. doi: 10.3390/v14071583 (PMC9318963; doi:10.3390/v14071583)
Supplement: Supplementary file 1 [file viruses-14-01583-s001.zip › Table S1.xlsx]

## Sheet: Sheet1
Supplementary Table 1. Primers and probes for real time PCR analysis
Target	Sequence
SARS-CoV-2 sub-genomic N gene	Forward: 5'-CCCAGGTAACAAACCAACCAAC-3'
	Reverse: 5'-AGTGAGAGCGGTGAACCAAG-3'
	Probe: 5'-CGTTTGGTGGACCCTCAGATTCAACTGGCA-3'
Influenza A/H1N1 M2 gene	Forward: 5'-GACCRATCCTGTCACCTCTGAC-3'
	Reverse: 5'-AGGGCATTYTGGACAAAKCGTCTA-3'
	Probe: 5'-TGCAGTCCTCGCTCACTGGGCACG-3'
IFNλ1	Forward: 5'- CGCCTTGGAAGAGTCACTCA -3'
	Reverse: 5'- GAAGCCTCAGGTCCCAATTC -3'
IFI6	Forward: 5'-GGTGGAGGCAGGTAAGAAAAAG-3'
	Reverse: 5'-ATCGCAGACCAGCTCATCAG-3'
MX1	Forward: 5'-GGAGATCTTTCAGCACCTG-3'
	Reverse: 5'-ACGTCTGGAGCATGAAGAACTG-3'
	Probe: 5'-CCTATCACCAGGAGGCCAGC-3'
IFIT1	Forward: 5'-AAATCCACAAGACAGAATAGCC-3’
	Reverse: 5'-TGCTCCAGACTATCCTTGAC-3’
ISG15	Forward: 5'-TCATCTTTGCCAGTACAG-3’
	Reverse: 5'-CATCTTCACCGTCAGGTC-3’
β-actin	Forward: 5'-CCTGGCACCCAGCACAAT-3'
	Reverse: 5'- GCCGATCCACACGGAGTACT-3'
	Probe: 5'- ATCAAGATCATTGCTCCTCCTGAGCGC-3'
